# Supplementary material for: Early Mortality in Infants Born with Neonatally Operated Congenital Heart Defects and Low or Very-Low Birthweight: A Systematic Review and Meta-Analysis
Source: MDPI journal article supplement (doi:10.3390/jcdd10020047), 2023-01-27
Supplement: s1 [file s1]

Supplementary materials:

Table S1. PRISMA 2020 checklist (1/3)

| Section and Topic             | Item # | Checklist item                                                                                                                                                                                                                                                                                       | Location where item is reported |
|-------------------------------|--------|------------------------------------------------------------------------------------------------------------------------------------------------------------------------------------------------------------------------------------------------------------------------------------------------------|---------------------------------|
| <b>TITLE</b>                  |        |                                                                                                                                                                                                                                                                                                      |                                 |
| Title                         | 1      | Identify the report as a systematic review.                                                                                                                                                                                                                                                          | P1                              |
| <b>ABSTRACT</b>               |        |                                                                                                                                                                                                                                                                                                      |                                 |
| Abstract                      | 2      | See the PRISMA 2020 for Abstracts checklist.                                                                                                                                                                                                                                                         | P2                              |
| <b>INTRODUCTION</b>           |        |                                                                                                                                                                                                                                                                                                      |                                 |
| Rationale                     | 3      | Describe the rationale for the review in the context of existing knowledge.                                                                                                                                                                                                                          | P4                              |
| Objectives                    | 4      | Provide an explicit statement of the objective(s) or question(s) the review addresses.                                                                                                                                                                                                               | P4                              |
| <b>METHODS</b>                |        |                                                                                                                                                                                                                                                                                                      |                                 |
| Eligibility criteria          | 5      | Specify the inclusion and exclusion criteria for the review and how studies were grouped for the syntheses.                                                                                                                                                                                          | P5                              |
| Information sources           | 6      | Specify all databases, registers, websites, organisations, reference lists and other sources searched or consulted to identify studies. Specify the date when each source was last searched or consulted.                                                                                            | P6;P9                           |
| Search strategy               | 7      | Present the full search strategies for all databases, registers and websites, including any filters and limits used.                                                                                                                                                                                 | P36                             |
| Selection process             | 8      | Specify the methods used to decide whether a study met the inclusion criteria of the review, including how many reviewers screened each record and each report retrieved, whether they worked independently, and if applicable, details of automation tools used in the process.                     | P6                              |
| Data collection process       | 9      | Specify the methods used to collect data from reports, including how many reviewers collected data from each report, whether they worked independently, any processes for obtaining or confirming data from study investigators, and if applicable, details of automation tools used in the process. | P6                              |
| Data items                    | 10a    | List and define all outcomes for which data were sought. Specify whether all results that were compatible with each outcome domain in each study were sought (e.g. for all measures, time points, analyses), and if not, the methods used to decide which results to collect.                        | P6;P7                           |
|                               | 10b    | List and define all other variables for which data were sought (e.g. participant and intervention characteristics, funding sources). Describe any assumptions made about any missing or unclear information.                                                                                         | P7                              |
| Study risk of bias assessment | 11     | Specify the methods used to assess risk of bias in the included studies, including details of the tool(s) used, how many reviewers assessed each study and whether they worked independently, and if applicable, details of automation tools used in the process.                                    | P7                              |
| Effect measures               | 12     | Specify for each outcome the effect measure(s) (e.g. risk ratio, mean difference) used in the synthesis or presentation of results.                                                                                                                                                                  | P7                              |
| Synthesis methods             | 13a    | Describe the processes used to decide which studies were eligible for each synthesis (e.g. tabulating the study intervention characteristics and comparing against the planned groups for each synthesis (item #5)).                                                                                 | P7                              |
|                               | 13b    | Describe any methods required to prepare the data for presentation or synthesis, such as handling of missing summary statistics, or data conversions.                                                                                                                                                | N/A                             |
|                               | 13c    | Describe any methods used to tabulate or visually display results of individual studies and syntheses.                                                                                                                                                                                               | P7                              |

**Table S1 (continued). PRISMA 2020 checklist (2/3)**

| Section and topic             | Item # | Checklist item                                                                                                                                                                                                                                                                       | Location where item is reported |
|-------------------------------|--------|--------------------------------------------------------------------------------------------------------------------------------------------------------------------------------------------------------------------------------------------------------------------------------------|---------------------------------|
| Synthesis methods             | 13d    | Describe any methods used to synthesize results and provide a rationale for the choice(s). If meta-analysis was performed, describe the model(s), method(s) to identify the presence and extent of statistical heterogeneity, and software package(s) used.                          | P7;P8                           |
|                               | 13e    | Describe any methods used to explore possible causes of heterogeneity among study results (e.g. subgroup analysis, meta-regression).                                                                                                                                                 | P7;P8                           |
|                               | 13f    | Describe any sensitivity analyses conducted to assess robustness of the synthesized results.                                                                                                                                                                                         | P8                              |
| Reporting bias assessment     | 14     | Describe any methods used to assess risk of bias due to missing results in a synthesis (arising from reporting biases).                                                                                                                                                              | N/A                             |
| Certainty assessment          | 15     | Describe any methods used to assess certainty (or confidence) in the body of evidence for an outcome.                                                                                                                                                                                | N/A                             |
| <b>RESULTS</b>                |        |                                                                                                                                                                                                                                                                                      |                                 |
| Study selection               | 16a    | Describe the results of the search and selection process, from the number of records identified in the search to the number of studies included in the review, ideally using a flow diagram.                                                                                         | P9; P27                         |
|                               | 16b    | Cite studies that might appear to meet the inclusion criteria, but which were excluded, and explain why they were excluded.                                                                                                                                                          | P9; P27                         |
| Study characteristics         | 17     | Cite each included study and present its characteristics.                                                                                                                                                                                                                            | P9; P23-24                      |
| Risk of bias in studies       | 18     | Present assessments of risk of bias for each included study.                                                                                                                                                                                                                         | P10; P25                        |
| Results of individual studies | 19     | For all outcomes, present, for each study: (a) summary statistics for each group (where appropriate) and (b) an effect estimate and its precision (e.g. confidence/credible interval), ideally using structured tables or plots.                                                     | P10-11; P26; P28                |
| Results of syntheses          | 20a    | For each synthesis, briefly summarise the characteristics and risk of bias among contributing studies.                                                                                                                                                                               | P10; P25                        |
|                               | 20b    | Present results of all statistical syntheses conducted. If meta-analysis was done, present for each the summary estimate and its precision (e.g. confidence/credible interval) and measures of statistical heterogeneity. If comparing groups, describe the direction of the effect. | P10-11; P26; P28                |
|                               | 20c    | Present results of all investigations of possible causes of heterogeneity among study results.                                                                                                                                                                                       | P26; P28                        |
|                               | 20d    | Present results of all sensitivity analyses conducted to assess the robustness of the synthesized results.                                                                                                                                                                           | P26; P28                        |
| Reporting biases              | 21     | Present assessments of risk of bias due to missing results (arising from reporting biases) for each synthesis assessed.                                                                                                                                                              | N/A                             |
| Certainty of evidence         | 22     | Present assessments of certainty (or confidence) in the body of evidence for each outcome assessed.                                                                                                                                                                                  | N/A                             |

Table S1 (continued). PRISMA 2020 checklist (3/3)

| Section and topic                              | Item # | Checklist item                                                                                                                                                                                                                             | Location of where item is reported |
|------------------------------------------------|--------|--------------------------------------------------------------------------------------------------------------------------------------------------------------------------------------------------------------------------------------------|------------------------------------|
| <b>DISCUSSION</b>                              |        |                                                                                                                                                                                                                                            |                                    |
| Discussion                                     | 23a    | Provide a general interpretation of the results in the context of other evidence.                                                                                                                                                          | P12-14                             |
|                                                | 23b    | Discuss any limitations of the evidence included in the review.                                                                                                                                                                            | P14-15                             |
|                                                | 23c    | Discuss any limitations of the review processes used.                                                                                                                                                                                      | P15                                |
|                                                | 23d    | Discuss implications of the results for practice, policy, and future research.                                                                                                                                                             | P15                                |
| <b>OTHER INFORMATION</b>                       |        |                                                                                                                                                                                                                                            |                                    |
| Registration and protocol                      | 24a    | Provide registration information for the review, including register name and registration number, or state that the review was not registered.                                                                                             | P5                                 |
|                                                | 24b    | Indicate where the review protocol can be accessed, or state that a protocol was not prepared.                                                                                                                                             | P5;P17                             |
|                                                | 24c    | Describe and explain any amendments to information provided at registration or in the protocol.                                                                                                                                            | P33                                |
| Support                                        | 25     | Describe sources of financial or non-financial support for the review, and the role of the funders or sponsors in the review.                                                                                                              | P16                                |
| Competing interests                            | 26     | Declare any competing interests of review authors.                                                                                                                                                                                         | P16                                |
| Availability of data, code and other materials | 27     | Report which of the following are publicly available and where they can be found: template data collection forms; data extracted from included studies; data used for all analyses; analytic code; any other materials used in the review. | N/A                                |

Legend: P page; N/A not applicable

Table S2. Discrepancies between the protocol (PROSPERO CRD4202170289) and the final review

| Discrepancy                              | Protocol                                                                                                                                                             | Final review                                                                                                                                                       |
|------------------------------------------|----------------------------------------------------------------------------------------------------------------------------------------------------------------------|--------------------------------------------------------------------------------------------------------------------------------------------------------------------|
| <b>Study question</b>                    | What are the adverse outcomes in growth restricted infants with CHD? How are adverse outcomes affected by the severity of growth restriction affect and type of CHD? | What are the adverse outcomes in Low birth weight and Very low birth weight infants?                                                                               |
| <b>Search date</b>                       | inception up until 29/02/2020                                                                                                                                        | inception up until 13/10/2021                                                                                                                                      |
| <b>Condition or domain being studied</b> | Isolated CHD, i.e., CHD not associated with any known chromosomal, genetic or other anomalies or syndromes.                                                          | Isolated CHD and certain specific CHD with a low percentage of chromosomal, genetic or other anomalies or syndromes                                                |
| <b>Main outcome (s)</b>                  | Mortality and a range of morbidity indicators                                                                                                                        | Main focus: mortality 1 month after surgical intervention.                                                                                                         |
| <b>Strategy for data analysis</b>        | Meta-analysis of pooled OR. Analysis to be carried out on Stata 12.1. Heterogeneity assessed using I <sup>2</sup> statistic and Forest plots                         | Meta-analysis of proportionate mortality. Analysis carried out on Stata 15. Heterogeneity assessed using I <sup>2</sup> statistic, Forest plot and metaregression. |

**Table S3. Detailed literature search strategy**

| Database      | Search string                                                                                                                                                                                                                                                                                                                                                                                                                                                                                                                                                                                                                                                                                                                                                                                                                                                                                                                                                                                                                                                                                                                                                                                                     |
|---------------|-------------------------------------------------------------------------------------------------------------------------------------------------------------------------------------------------------------------------------------------------------------------------------------------------------------------------------------------------------------------------------------------------------------------------------------------------------------------------------------------------------------------------------------------------------------------------------------------------------------------------------------------------------------------------------------------------------------------------------------------------------------------------------------------------------------------------------------------------------------------------------------------------------------------------------------------------------------------------------------------------------------------------------------------------------------------------------------------------------------------------------------------------------------------------------------------------------------------|
| <b>Pubmed</b> | ((((((((((((((((("congenital cardiac"[Title/Abstract]) OR "congenital cardiovascular"[Title/Abstract]) OR "congenital heart anomalies"[Title/Abstract]) OR "congenital heart malformations"[Title/Abstract])) OR "Heart Septal Defects"[Title/Abstract]) OR "Truncus Arteriosus"[Title/Abstract])) OR "Common arterial trunk"[Title/Abstract]) OR "Aortic Valve Stenosis"[Title/Abstract]) OR "Transposition of Great Vessels"[Title/Abstract])) OR "Aortic Coarctation"[Title/Abstract]) OR "Hypoplastic Left Heart Syndrome"[Title/Abstract]) OR "Pulmonary Valve Stenosis"[Title/Abstract])) OR "Tetralogy of Fallot"[Title/Abstract]) OR "Atrioventricular Septal Defect"[Title/Abstract]) OR "Congenital heart defect"[Title/Abstract]) OR "Congenital heart disease"[Title/Abstract])) OR (("Heart Defects, Congenital"[Mesh]) OR "Pulmonary Atresia"[Mesh])) AND (((((((("Fetal Growth Retardation"[Title/Abstract]) OR "Small for Gestational Age"[Title/Abstract]) OR "Low Birth Weight"[Title/Abstract]) OR "Fetal Growth Restriction"[Title/Abstract])) OR (((("Infant, Low Birth Weight"[Mesh]) OR "Infant, Small for Gestational Age"[Mesh]) OR "Fetal Growth Retardation"[Mesh])))) Filters: Humans |
| <b>Embase</b> | 'congenital heart malformation' AND ('intrauterine growth retardation' OR 'small for date infant'/exp) AND [embase]/lim NOT ([embase]/lim AND [medline]/lim)                                                                                                                                                                                                                                                                                                                                                                                                                                                                                                                                                                                                                                                                                                                                                                                                                                                                                                                                                                                                                                                      |

**Table S4. Summary of comparable outcomes in studies on LBW and VLBW not used in the meta-analysis**

| Outcome          | Author   | Year | Term (weeks) | Object | CHD                                 | Result                                            | 95% CI       | Measurement                        |
|------------------|----------|------|--------------|--------|-------------------------------------|---------------------------------------------------|--------------|------------------------------------|
| <b>mortality</b> |          |      |              |        |                                     |                                                   |              |                                    |
| 90 day postop    | Curzon   | 2008 | all          | LBW    | HLHS                                | 1.4                                               | 1.0-2.0      | Risk Ratio                         |
|                  |          |      |              |        | TAPVR                               | 3.0                                               | 1.4-6.2      |                                    |
|                  |          |      |              |        | TGA                                 | 4.6                                               | 1.0-22.0     |                                    |
|                  |          |      |              |        | CoA                                 | 2.65                                              | 1.1-6.2      |                                    |
| <b>Survival</b>  |          |      |              |        |                                     |                                                   |              |                                    |
| 5 year           | Bacha    | 2001 | PT (26-35)   | VLBW   | CoA                                 | 80%                                               | 70%-90%*     | Kaplan meier<br>actuarial estimate |
| 5 year           | Best     | 2017 | term         | LBW    | all i.CHD                           | 95.2%                                             | 94.2%-96.3%  | conditional survival<br>estimate   |
|                  |          |      | very PT      |        |                                     | 78.8%                                             | 72.8%-84.7%  |                                    |
|                  |          |      | term         | LBW    | Severe CHD type1<br>(includes HLHS) | 53.5%                                             | 33.0%-73.9%  |                                    |
|                  |          |      | PT           | LBW    |                                     | 32.5%                                             | 7.4% - 57.5% |                                    |
|                  |          |      | term         | LBW    | ToF                                 | 89.3%                                             | 82.2%-96.4%  |                                    |
|                  |          |      | PT           | LBW    |                                     | 84.4%                                             | 73.0%-96.0%  |                                    |
|                  |          |      | term         | LBW    | TGA                                 | 92.5%                                             | 86.4 -98.6%  |                                    |
|                  |          |      | PT           | LBW    |                                     | 72.5%                                             | 51.1%-93.9%  |                                    |
|                  |          |      | term         | LBW    | CoA                                 | 90.2%                                             | 82.4%-98.0%  |                                    |
|                  |          |      | PT           | LBW    |                                     | 79.9%                                             | 62.0%-97.8%  |                                    |
| 1 year post op   | Hirsch   | 2011 | PT           | LBW    | HLHS                                | 55%                                               |              |                                    |
| 1 year           | Karamlou | 2009 | all          | LBW    | CoA                                 | 76% overall (67%<br>before 1999 and<br>90% after) | not stated   | Kaplan meier<br>survival curve     |
| 6 months         | Manchego | 2018 | PT           | LBW    | HLHS                                | 40%                                               | not stated   | proportions                        |
|                  |          |      |              |        | CoA                                 | 87%                                               | not stated   | proportions                        |
|                  |          |      |              |        | TGA                                 | 76%                                               | not stated   |                                    |

Table S4 (continued). Summary of comparable outcomes in studies not used in the meta-analysis (2/3)

| Outcome                                                      | Author  | Year | Term | Object | CHD            | Result           | 95% CI     | Measurement         |
|--------------------------------------------------------------|---------|------|------|--------|----------------|------------------|------------|---------------------|
| Survival                                                     |         |      |      |        |                |                  |            |                     |
| 6 year                                                       | Miller  | 2019 | all  | LBW    | HLHS           | 1.7              | 1.2-2.4    | Hazards ratio       |
| Midterm                                                      | Murphy  | 2015 | all  | LBW    | HLHS           | 53%              | not stated | proportion          |
| 1 year                                                       | Oster   | 2013 | all  | LBW    | CCHD           | 1.74             | 1.34-2.24  | Hazards ratio       |
| Overall survival overtime<br>between 1979-2005               | Siffle  | 2015 | all  | VLBW   | HLHS           | 0%               | /          | proportion          |
|                                                              |         |      |      | LBW    |                | 15.6%            | 5.7%-30.0% |                     |
| Necrotizing enterocolitis                                    |         |      |      |        |                |                  |            |                     |
|                                                              | Bain    | 2014 | PT   | VLBW   | ASD            | 1.26             | 1.06-1.49  | adjusted Odds Ratio |
|                                                              |         |      |      |        | VSD            | 1.27             | 1.08-1.52  |                     |
|                                                              |         |      |      |        | ASD and<br>VSD | 1.80             | 1.03-3.12  |                     |
|                                                              | Pappas  | 2012 | PT   | VLBW   | all CHD+       | 1.23             | 0.73-2.04  | adjusted Risk Ratio |
| Neurodevelopment                                             |         |      |      |        |                |                  |            |                     |
| Bayley mental development<br>index evaluated at 18-22 months | Pappas  | 2012 | PT   | VLBW   | all CHD+       | score <70: 1.61  | 1.21-2.13  | adjusted Risk Ratio |
| Psychomotor development index                                |         |      |      |        |                | score <70:1.44   | 0.93-2.21  |                     |
| Neurodevelopment impairment                                  |         |      |      |        |                | score < 70: 1.45 | 1.13-1.87  |                     |
| neurological disease                                         | Roussin | 2007 | PT   | VLBW   | TGA            | n=1              | /          | proportion          |

Table S4 (continued). Summary of comparable outcomes in studies not used in the meta-analysis (3/3)

| Outcome                                                              | Author  | Year | Term | Object | CHD         | Result                           | 95% CI         | Measurement                |
|----------------------------------------------------------------------|---------|------|------|--------|-------------|----------------------------------|----------------|----------------------------|
| <b>Neurodevelopment</b>                                              |         |      |      |        |             |                                  |                |                            |
| Evaluated at 6 years using<br>BASC adaptive skill composite<br>score | Miller  | 2019 | all  | LBW    | HLHS        | female: 40<br>male: 50           | 21-55<br>35-62 | mean standard<br>deviation |
| Vineland II score:                                                   |         |      |      | LBW    |             | adaptive behaviour composite: 90 | 70-115         |                            |
|                                                                      |         |      |      |        |             | communication: 85                | 75-125         |                            |
|                                                                      |         |      |      |        |             | daily living skills: 90          | 60-120         |                            |
|                                                                      |         |      |      |        |             | motor skills: 80                 | 60-110         |                            |
|                                                                      |         |      |      |        |             | socialization: 100               | 75-130         |                            |
| <b>Length of mechanical ventilation</b>                              |         |      |      |        |             |                                  |                |                            |
|                                                                      | Kalfa   | 2015 | all  | LBW    | HLHS        | 7.5                              | 1-35           | median days                |
|                                                                      | Kalfa   | 2014 | all  |        | all<br>CHD* | 4                                | 1-32           | days                       |
| Prolonged ventilation                                                | Roussin | 2007 | PT   | VLBW   | TGA         | n=8                              | /              | proportion                 |

**Table S5. Results of studies on specifically on the adverse outcomes in infants with SGA and CHD (1/2)**

| Outcome                                                       | Author    | Year | Term (weeks) | CHD       | Result | 95% CI     | Measurement         |
|---------------------------------------------------------------|-----------|------|--------------|-----------|--------|------------|---------------------|
| <b>Mortality</b>                                              |           |      |              |           |        |            |                     |
| During hospitalisation                                        | El Hassan | 2018 | all          | HLHS      | 27.6%  |            | Proportion          |
| 6 year mortality after Norwood procedure                      | Miller    | 2019 | all          | HLHS      | 0.93   | 0.86-1.02  | Hazards ratio       |
| Hospital mortality after surgery                              | Roussin   | 2007 | PT           | TGA       | 30.7%  |            | Proportion          |
| 1 year                                                        | Steurer   | 2018 | PT (<32)     | CCHD      | 1.6    | 0.8-3.4    | adjusted Odds Ratio |
|                                                               |           |      | PT (32-33)   |           | 2.3    | 0.9-6.2    |                     |
|                                                               |           |      | PT (34)      |           | 0.9    | 0.3-3.0    |                     |
|                                                               |           |      | PT (35)      |           | 1.8    | 0.8-4.4    |                     |
|                                                               |           |      | PT (36)      |           | 1.7    | 0.9-3.3    |                     |
|                                                               |           |      | term (37)    |           | 2.8    | 1.7-4.5    |                     |
|                                                               |           |      | term (38)    |           | 1.6    | 1.1-2.6    |                     |
|                                                               |           |      | term (39)    |           | 1.9    | 1.3-2.8    |                     |
|                                                               |           |      | term (40)    |           | 2.6    | 1.5-4.4    |                     |
|                                                               |           |      | term (41)    |           | 1.3    | 0.4-4.4    |                     |
| <b>Survival</b>                                               |           |      |              |           |        |            |                     |
| Transplant free survival from birth through Fontan palliation | Gelehrter | 2011 | PT           | HLHS      | 18%    | not stated | proportion          |
| Live at discharge                                             | Story     | 2015 | all          | all i.CHD | 82%    | not stated | proportion          |
| <b>Necrotizing enterocolitis</b>                              |           |      |              |           |        |            |                     |
|                                                               | El Hassan | 2018 | all          | HLHS      | 10.6%  | Not stated | proportion          |
|                                                               | Story     | 2015 | all          | all i.CHD | 6%     | not stated | proportion          |

**Table S5 (continued). Results of studies specifically on the adverse outcomes in infants with SGA and CHD (2/2)**

| Outcome                                                                                        | Author   | Year | Term | CHD       | Result                                              | 95% CI              | Measurement             |
|------------------------------------------------------------------------------------------------|----------|------|------|-----------|-----------------------------------------------------|---------------------|-------------------------|
| <b>Neurodevelopment</b>                                                                        |          |      |      |           |                                                     |                     |                         |
| Cognitive impairment: KABC global score $\geq 1$ SD below normative value evaluated at 3 years | Calderon | 2017 | all  | all i.CHD | no surgery group : 1.3<br>cardiac surgery group:5.9 | 0.5-3.6<br>1.7-20.1 | adjusted Odds Ratio     |
| Neurodevelopment evaluated at 6 years using BASC adaptive skill composite score                | Miller   | 2019 | all  | HLHS      | female and male 45                                  | 38-58               | mean standard deviation |
| Neurodevelopment evaluated at 6 years Vineland scores                                          |          |      |      |           | adaptive behaviour composite: 90                    | 80-120              |                         |
|                                                                                                |          |      |      |           | communication: 100                                  | 82-122              |                         |
|                                                                                                |          |      |      |           | daily living skills: 90                             | 80-120              |                         |
|                                                                                                |          |      |      |           | motor skills: 85                                    | 75-100              |                         |
|                                                                                                |          |      |      |           | socialization: 100                                  | 80-125              |                         |

**Legend:** ; § population based study; + preterm births only; i.CHD isolated CHD; CCHD critical CHD; LBW low birthweight; N CHD total number of congenital heart defects; NEC necrotizing enterocolitis; SGA small for gestational age; VLBW very low birthweight; HLHS hypoplastic left heart syndrome;a; TGA transposition of the great arteries
